# Supplementary material
Source: PubMed Central journal article supplement (PMC3661277)
Supplement: NIHMS460897-supplement-Supplementary_table_1.pdf [file NIHMS460897-supplement-Supplementary_table_1.pdf]

**Supplementary Table 1.** Mean doses, person-years, numbers of lung cancers by categories of plutonium dose to the lung.

| Plutonium lung dose (Gy) | Mean dose (Gy) | Person-years | Lung cancers | Relative Risk <sup>b</sup> (95% CI) |
|--------------------------|----------------|--------------|--------------|-------------------------------------|
| 0 <sup>a</sup>           | 0.0            | 281,904      | 233          | 1.0                                 |
| >0 – 0.1                 | 0.025          | 90,376       | 128          | 0.99 (<1 to 1.2)                    |
| 0.1 – 0.2                | 0.14           | 8603         | 35           | 2.4 (1.6 to 3.4)                    |
| 0.2 – 0.3                | 0.24           | 3074         | 17           | 3.4 (1.9 to 5.6)                    |
| 0.3 – 0.5                | 0.38           | 2600         | 12           | 2.5 (1.2 to 4.5)                    |
| 0.5 – 1.0                | 0.70           | 2306         | 25           | 6.7 (4.2 to 11)                     |
| 1.0 – 2.0                | 1.40           | 1048         | 18           | 14.0 (7.8 to 24)                    |
| 2.0 – 4.0                | 2.77           | 711          | 10           | 11.8 (5.5 to 23)                    |
| 4.0+                     | 5.66           | 270          | 8            | 60.0 (25 to 130)                    |
| Total                    |                | 390,892      | 486          |                                     |

<sup>a</sup>Referent group.

<sup>b</sup>Shown for males at age 60.
